# Supplementary material for: TDP-43 upregulates lipid metabolism modulator ABHD2 to suppress apoptosis in hepatocellular carcinoma
Source: PubMed Central journal article supplement (PMC9376094; doi:10.1038/s42003-022-03788-w), 2022-08-13

## **Supplementary Information (SI) for:**

### **TDP-43 upregulates lipid metabolism modulator ABHD2 to suppress apoptosis in hepatocellular carcinoma**

#### **Supplementary Materials and methods**

##### **Cell Culture, transfection and treatments**

Human liver cancer cell lines (SMMC-7721, HepG2, MHCC97L, MHCC97H and Huh-7) and HEK 293T cell lines were purchased from American Type Culture Collection (ATCC, USA). Under the conditions of 5% CO<sub>2</sub> and 37°C, the cells were cultured in high-glucose Dulbecco's Modified Eagle's Medium (DMEM, BI, Israel) supplemented with 10% fetal bovine serum (FBS, Gibco, USA). The indicated plasmids or siRNA were delivered into selected cells by mean of lipofectamine 2000 reagent transfection (Invitrogen, USA) according to the manufacturer's instructions. To stably knockdown TDP-43 in HCC cells, MHCC97H cells were infected with lentivirus carrying pLVX-shTDP-43-puro or pLVX-shRNA-scramble-puro plasmid; then, the cells were treated with puromycin to obtain the stable cell line with TDP-43 silencing (MHCC97H-KD-TDP-43) or control cell line (MHCC97H-Control). The sequences of the two shRNAs against TDP-43 are listed in supplementary table. The sh-TDP-43#2 was finally used in the subsequent experiments. To analyze the stability of RNA, the indicated cells were treated with actinomycin D (Santa Cruz, USA) at 2 µg/ml for the corresponding time points. In Supplementary Figure 5, the indicated cells were treated with NAC (Beyotime, China) at 5mM for 48h. In Supplementary Figure 6, the indicated cells were treated with FFA (oleic acid, sigma) at 30µM for 48h.

##### **qRT-PCR assay**

The total RNA was extracted from HCC cells using Trizol (Takara, Japan) and then converted to cDNA according to the manuals of the EasyTaq DNA Polymerase (TRNASGen Biotech, China). Using SYBR Green Master Mix (Thermo Fisher Scientific, USA) reagent, qRT-PCR was completed through Applied Biosystems quantum 3 real time PCR system (Thermo Fisher Scientific). Using the expression level of *GAPDH* gene as a reference, the expression level of

each gene was analyzed by the  $\Delta\Delta\text{Ct}$  method. The primers used in this study were synthesized by Gene Create (Wuhan, China), and the primer sequences were shown in Supplementary table 2.

### **Reactive oxygen species (ROS) detection**

To measure the changes in the intracellular ROS levels, an oxidation-sensitive fluorescent probe DCFH-DA (Solarbio, China) was used. Briefly, the cells were laid in 6-well plates and transfected with indicated siRNAs or plasmids. After 48 h, 10  $\mu\text{M}$  DCFH-DA diluted by serum-free DMEM was added and incubated for 20 min, where DMSO was used as a blank control. The Rosup provided by the kit was used as a positive control. Subsequently, the cells were washed with serum-free medium for three times, and observed under the fluorescent microscope to detect the fluorescent signal. Image J software was used to quantify the fluorescence signal.

### **Determination of Triglyceride (TG) content**

In this experiment, intracellular total TG levels were measured by the Triglyceride Assay Kit (BC0625, Solarbio Science & Technology, China). Treated cells were collected and assayed for intracellular total TG levels according to the manufacturer's protocol. The experiment was performed separately for the blank group (A), the standard group (B), and the treated group (C). The TG content in cells was calculated according to the formula:  $\text{TG (mg}/10^4 \text{ cell)} = (\text{C}-\text{A})/(\text{B}-\text{A})/\text{cell density}$ .

### **Colony formation assay**

The cells were plated into 24-well plates and cultured with DMEM containing 10% FBS for 12 hours. Then, the cells were transfected with indicated plasmids or siRNAs. After 48 hours, the cells were re-suspended and plated in 6-well plate in DMEM without FBS for 20 days. The medium was changed every three days. After colony formation, it was washed twice with precooled PBS and fixed with 4% paraformaldehyde for 30 minutes. Then, the colony was dyed with 1% crystal violet at room temperature for 15 minutes and washed with PBS for three times. After natural air drying, the colony was observed and the formation efficiency was analyzed by software image J.

### **Dual luciferase reporter assay**

Dual luciferase reporter analysis was performed according to the manufacturer's instructions (Promega, USA). The *ABHD2* 3'UTR reporter constructs were transfected into HEK 293T cells along with indicated siRNAs or plasmids. The Renilla luciferase (pRL-TK) plasmid was co-transfected into cells as an internal control. After 48 hours, the cells were lysed and the luciferase activity was detected with the dual luciferase reporter assay system (Promega).

### **Cell Counting Kit-8 (CCK-8)**

The changes in cell proliferation were determined by Cell Counting Kit-8 (CCK-8) (Kemix, Australia). Firstly, the cells were seeded in 6-well plates, and transfected with indicated plasmids or siRNAs. After 48h, the transfected cells were digested with trypsin, and then re-laid into 96-well plates at the density of 1000 cells per well. Then, at the indicated time points, CCK-8 reagent (10 $\mu$ l) was added to each well and cultured for 2 hours. Finally, the OD450 was measured using a microplate reader. Six replicates were set in each group, the experiments were repeated at least three times.

## Supplementary tables

### Supplementary table 1

| The sequences of siRNAs and shRNAs |                       |
|------------------------------------|-----------------------|
| si-TDP-43#1                        | GCTTCGCTACAGGAATCCA   |
| si-TDP-43#2                        | GGAGAGGACTTGATCATT    |
| si-ABHD2#1                         | CCTCAAGAATGCAGGCTCA   |
| si-ABHD2#2                         | CAAGAATGCAGGCTCAACA   |
| sh-TDP-43#1                        | GCTCTAATTCTGGTGCAGCAA |
| sh-TDP-43#2                        | GCTTTGGCTCAAGCATGGATT |

### Supplementary table 2

| The sequences of qRT-PCR primers |                        |
|----------------------------------|------------------------|
| Bcl-2-Forward Primer             | GGTGGGGTCATGTGTGTGG    |
| Bcl-2-Reverse Primer             | CGGTTCAAGTACTCAGTCATCC |
| p53-Forward Primer               | GGAATTTGCGTGTGGAGTATTT |
| p53-Reverse Primer               | GTTGTAGTGGATGGTGGTACAG |
| TDP-43-Forward Primer            | TCATCCCCAAGCCATTCAGG   |
| TDP-43-Reverse Primer            | TGCTTAGGTTCCGGCATTGGA  |
| ABHD2 -Forward Primer            | GCCCCACCTGACCTCTACT    |
| ABHD2 -Reverse Primer            | AACGAAAGTGCGGATGTATT   |
| Bax -Forward Primer              | TGAAGACAGGGGCCTTTTTG   |
| Bax -Reverse Primer              | AATTCGCCGGAGACACTCG    |
| GAPDH -Forward Primer            | AATCCCATCACCATCTTCCA   |
| GAPDH -Reverse Primer            | TTCACACCCATGACGAACAT   |
| HAL-Forward Primer               | AGAATAAGCCCGACAATGGTG  |
| HAL-Reverse Primer               | TTCCACGAACTCGTTGTTCTC  |
| ALPI-Forward Primer              | TACACGTCCATCCTGTACGG   |
| ALPI-Reverse Primer              | CTCGTCTCATTACGTCTGG    |
| GCH1-Forward Primer              | GTGAGCATCACTTGGTTCCAT  |
| GCH1-Reverse Primer              | GTAAGGCGCTCCTGAACTTGT  |
| PIP5KL1-Forward Primer           | GCATCTCCGAGAGGTATGACA  |
| PIP5KL1-Reverse Primer           | GAGGCTGTAATCCAGCACGTT  |
| LCLAT1-Forward Primer            | CACCCTACCTGTGGCATTATTG |
| LCLAT1-Reverse Primer            | CCATTCTTGCCGATGGTTCAT  |
| KLHL8-Forward Primer             | GACATGGCGGATCAGTATGCC  |
| KLHL8-Reverse Primer             | GCTGCGGTGATACTTACAA    |
| CBARP-Forward Primer             | GCCCCTCAAGATTGTCACCAT  |
| CBARP-Reverse Primer             | CTGATCTCTGCGAAGTCAGTG  |
| LIPG-Forward Primer              | GATGCGGTCAATAATACCAGGG |
| LIPG-Reverse Primer              | CCGATCAAGTGGACATTCCCG  |
| HPD-Forward Primer               | GAAACACGGTGACGGAGTGAA  |
| HPD-Reverse Primer               | CTCCCGCATGATTTGGCG     |

**Supplementary table 3**

| <b>Primers for the construction of ABHD2 3'UTR</b> |                                               |
|----------------------------------------------------|-----------------------------------------------|
| WT-Forward Primer                                  | GTCGAAAATGCAAACCTGGG                          |
| WT-Reverse Primer                                  | CATGCAGAGTGCTATTTCTT                          |
| Del-1-Forward Primer                               | GTCGAAAATGCAAACCTGGGGAGGGCAGAAAGATCAA<br>GGCT |
| Del-1-Reverse Primer                               | CATGCAGAGTGCTATTTCTT                          |
| Del-2-Forward Primer                               | GTCGAAAATGCAAACCTGGG                          |
| Site-delete-reverse<br>Primer                      | TGACCATTTTTTTACAGCGT                          |
| Site-delete-forward<br>Primer                      | ACGCTGTAAAAAAATGGTCA                          |
| Del-2-Reverse Primer                               | CATGCAGAGTGCTATTTCTT                          |

**Supplementary table 4**

| <b>Clinical characteristics of 32 pairs of clinical liver cancer tissues in microarray</b> |            |               |                    |                        |                  |
|--------------------------------------------------------------------------------------------|------------|---------------|--------------------|------------------------|------------------|
| <b>No.</b>                                                                                 | <b>Age</b> | <b>Gender</b> | <b>Type</b>        | <b>Differentiation</b> | <b>Diagnosis</b> |
| 1                                                                                          | 55         | M             | Hepatocellular     | Low                    | Carcinoma        |
| 2                                                                                          | 55         | M             | Hepatocellular     | Low                    | Para-carcinoma   |
| 3                                                                                          | 52         | F             | Cholangiocarcinoma | Low                    | Carcinoma        |
| 4                                                                                          | 52         | F             | Cholangiocarcinoma | Low                    | Para-carcinoma   |
| 5                                                                                          | 73         | F             | Hepatocellular     | High                   | Carcinoma        |
| 6                                                                                          | 73         | F             | Hepatocellular     | High                   | Para-carcinoma   |
| 7                                                                                          | 58         | M             | Nodular            | -                      | Carcinoma        |
| 8                                                                                          | 58         | M             | Nodular            | -                      | Para-carcinoma   |
| 9                                                                                          | 57         | M             | Hepatocellular     | Middle                 | Carcinoma        |
| 10                                                                                         | 57         | M             | Hepatocellular     | Middle                 | Para-carcinoma   |
| 11                                                                                         | 58         | F             | Cholangiocarcinoma | Low                    | Carcinoma        |
| 12                                                                                         | 58         | F             | Cholangiocarcinoma | Low                    | Para-carcinoma   |
| 13                                                                                         | 52         | F             | Cholangiocarcinoma | Low                    | Carcinoma        |
| 14                                                                                         | 52         | F             | Cholangiocarcinoma | Low                    | Para-carcinoma   |
| 15                                                                                         | 50         | M             | Hepatocellular     | Middle                 | Carcinoma        |
| 16                                                                                         | 50         | M             | Hepatocellular     | Middle                 | Para-carcinoma   |
| 17                                                                                         | 39         | M             | Hepatocellular     | High                   | Carcinoma        |
| 18                                                                                         | 39         | M             | Hepatocellular     | High                   | Para-carcinoma   |
| 19                                                                                         | 65         | M             | Hepatocellular     | High                   | Carcinoma        |
| 20                                                                                         | 65         | M             | Hepatocellular     | High                   | Para-carcinoma   |

|    |    |   |                |        |                |
|----|----|---|----------------|--------|----------------|
| 21 | 35 | M | Hepatocellular | Middle | Carcinoma      |
| 22 | 35 | M | Hepatocellular | Middle | Para-carcinoma |
| 23 | 59 | M | Hepatocellular | Middle | Carcinoma      |
| 24 | 59 | M | Hepatocellular | Middle | Para-carcinoma |
| 25 | 35 | M | Hepatocellular | Middle | Carcinoma      |
| 26 | 35 | M | Hepatocellular | Middle | Para-carcinoma |
| 27 | 54 | F | Hepatocellular | High   | Carcinoma      |
| 28 | 54 | F | Hepatocellular | High   | Para-carcinoma |
| 29 | 52 | M | Hepatocellular | Low    | Carcinoma      |
| 30 | 52 | M | Hepatocellular | Low    | Para-carcinoma |
| 31 | 56 | M | Hepatocellular | Middle | Carcinoma      |
| 32 | 56 | M | Hepatocellular | Middle | Para-carcinoma |
| 33 | 63 | M | Hepatocellular | Middle | Carcinoma      |
| 34 | 63 | M | Hepatocellular | Middle | Para-carcinoma |
| 35 | 37 | M | Hepatocellular | Middle | Carcinoma      |
| 36 | 37 | M | Hepatocellular | Middle | Para-carcinoma |
| 37 | 64 | M | Mixed          | Low    | Carcinoma      |
| 38 | 64 | M | Mixed          | Low    | Para-carcinoma |
| 39 | 54 | M | Hepatocellular | Middle | Carcinoma      |
| 40 | 54 | M | Hepatocellular | Middle | Para-carcinoma |
| 41 | 46 | M | Hepatocellular | Middle | Carcinoma      |
| 42 | 46 | M | Hepatocellular | Middle | Para-carcinoma |
| 43 | 57 | M | Hepatocellular | Middle | Carcinoma      |
| 44 | 57 | M | Hepatocellular | Middle | Para-carcinoma |
| 45 | 36 | M | Hepatocellular | High   | Carcinoma      |
| 46 | 36 | M | Hepatocellular | High   | Para-carcinoma |
| 47 | 61 | F | Mixed          | Low    | Carcinoma      |
| 48 | 61 | F | Mixed          | Low    | Para-carcinoma |
| 49 | 48 | M | Hepatocellular | High   | Carcinoma      |
| 50 | 48 | M | Hepatocellular | High   | Para-carcinoma |
| 51 | 37 | M | Hepatocellular | Middle | Carcinoma      |
| 52 | 37 | M | Hepatocellular | Middle | Para-carcinoma |
| 53 | 49 | M | Hepatocellular | Middle | Carcinoma      |
| 54 | 49 | M | Hepatocellular | Middle | Para-carcinoma |
| 55 | 42 | M | Hepatocellular | Middle | Carcinoma      |

|    |    |   |                |        |                |
|----|----|---|----------------|--------|----------------|
| 56 | 42 | M | Hepatocellular | Middle | Para-carcinoma |
| 57 | 63 | F | Hepatocellular | High   | Carcinoma      |
| 58 | 63 | F | Hepatocellular | High   | Para-carcinoma |
| 59 | 45 | M | Hepatocellular | Middle | Carcinoma      |
| 60 | 45 | M | Hepatocellular | Middle | Para-carcinoma |
| 61 | 54 | M | Hepatocellular | Middle | Carcinoma      |
| 62 | 54 | M | Hepatocellular | Middle | Para-carcinoma |
| 63 | 60 | M | Hepatocellular | Low    | Carcinoma      |
| 64 | 60 | M | Hepatocellular | Low    | Para-carcinoma |

Note: M: Male; F: Female

**Supplementary Figure 1. TDP-43 inhibits apoptosis and promotes proliferation in HCC cells.**

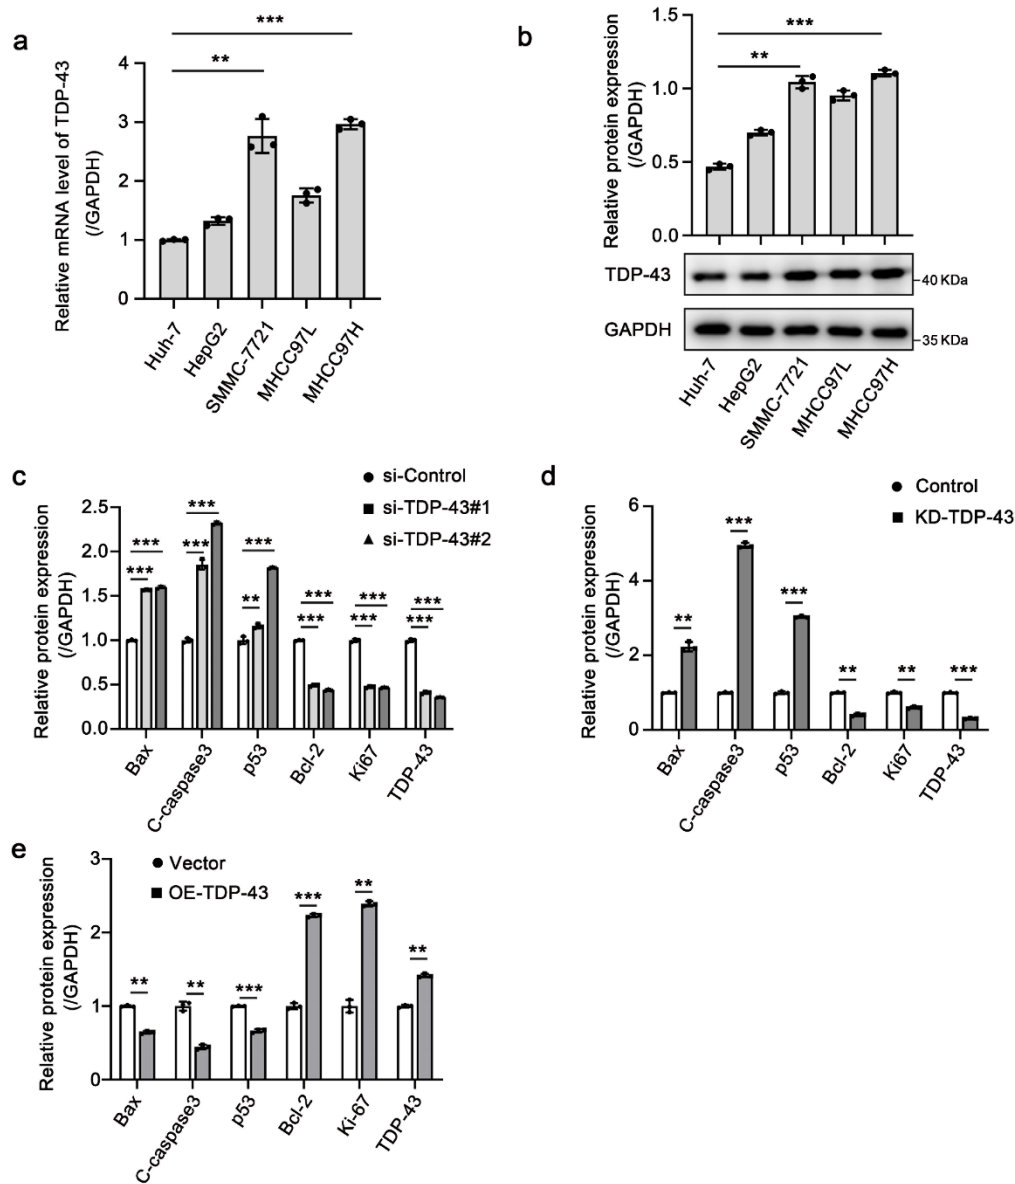

**a, b** qRT-PCR (a) and Western blot (b) analyses of TDP-43 in Huh-7, HepG2, SMMC-7721, MHCC97L, and MHCC97H cell lines. The upper panel in (b) shows the quantification of the intensity relative to GAPDH. **c-e** The quantification of the intensity relative to GAPDH in Fig. 1i. (c), (d) and (e) separately shows the quantification data in SMMC-7721, MHCC97H and Huh-7 cell lines. The values in the graphs represent the mean of three biologically independent experiments. Error bars represent  $\pm$ s. **d.** \* $P < 0.05$ , \*\* $P < 0.01$ , \*\*\* $P < 0.001$  by two-tailed Student's t-test.



**Supplementary Figure 2. Relative number statistics of differentially expressed genes in HCC cells after knockdown of TDP-43.**

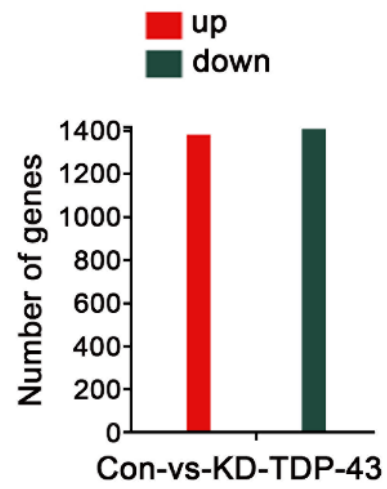

**Supplementary Figure 3. TDP-43 is positively related to ABHD2 and increases ABHD2 expression in HCC.**

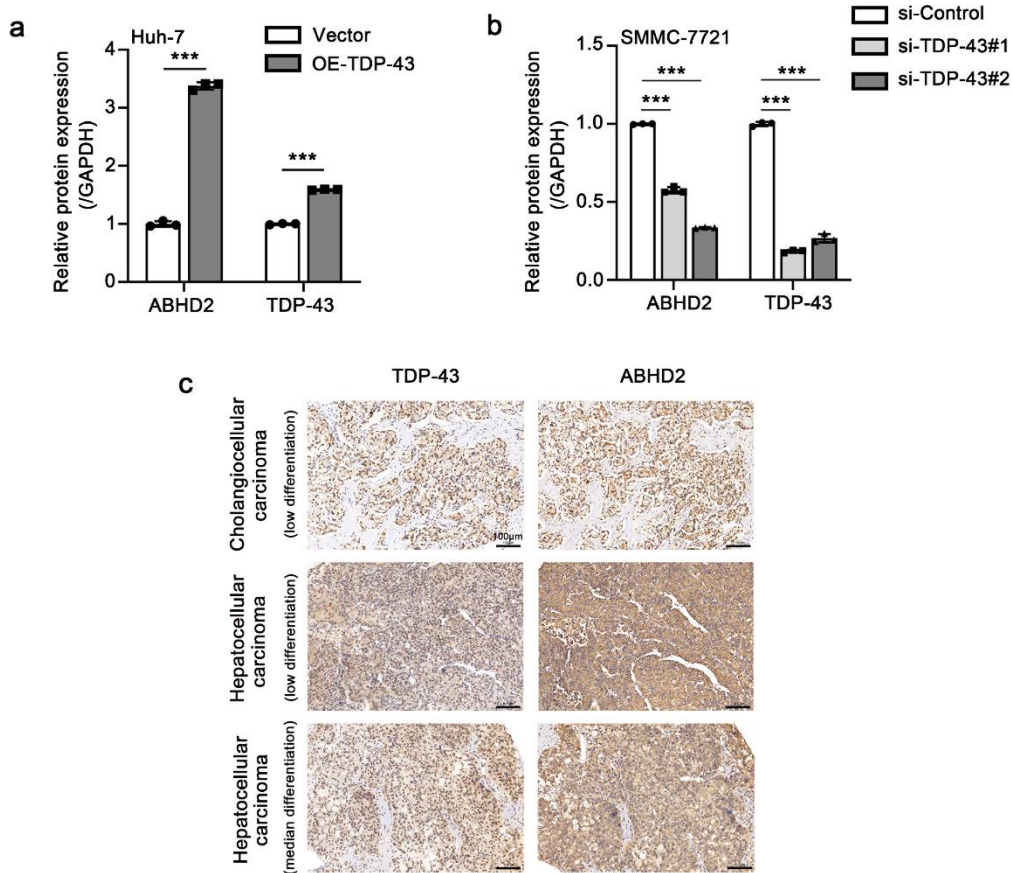

**a** Quantification of TDP-43 and ABHD2 protein intensity relative to GAPDH in Fig.4d (left panel). **b** Quantification of TDP-43 and ABHD2 protein intensity relative to GAPDH in Fig.4d (right panel). **c** IHC staining analysis of TDP-43 and ABHD2 expression in HCC tissue microarrays. Scale bar: 100  $\mu$ m. The values in the graphs represent the mean of three biologically independent experiments. Error bars represent  $\pm$ s. d. \* $P < 0.05$ , \*\* $P < 0.01$ , \*\*\* $P < 0.001$  by two-tailed Student's t-test.

**Supplementary Figure 4. Lipid metabolism modulator ABHD2 contributes to the malignant behaviors of HCC.**

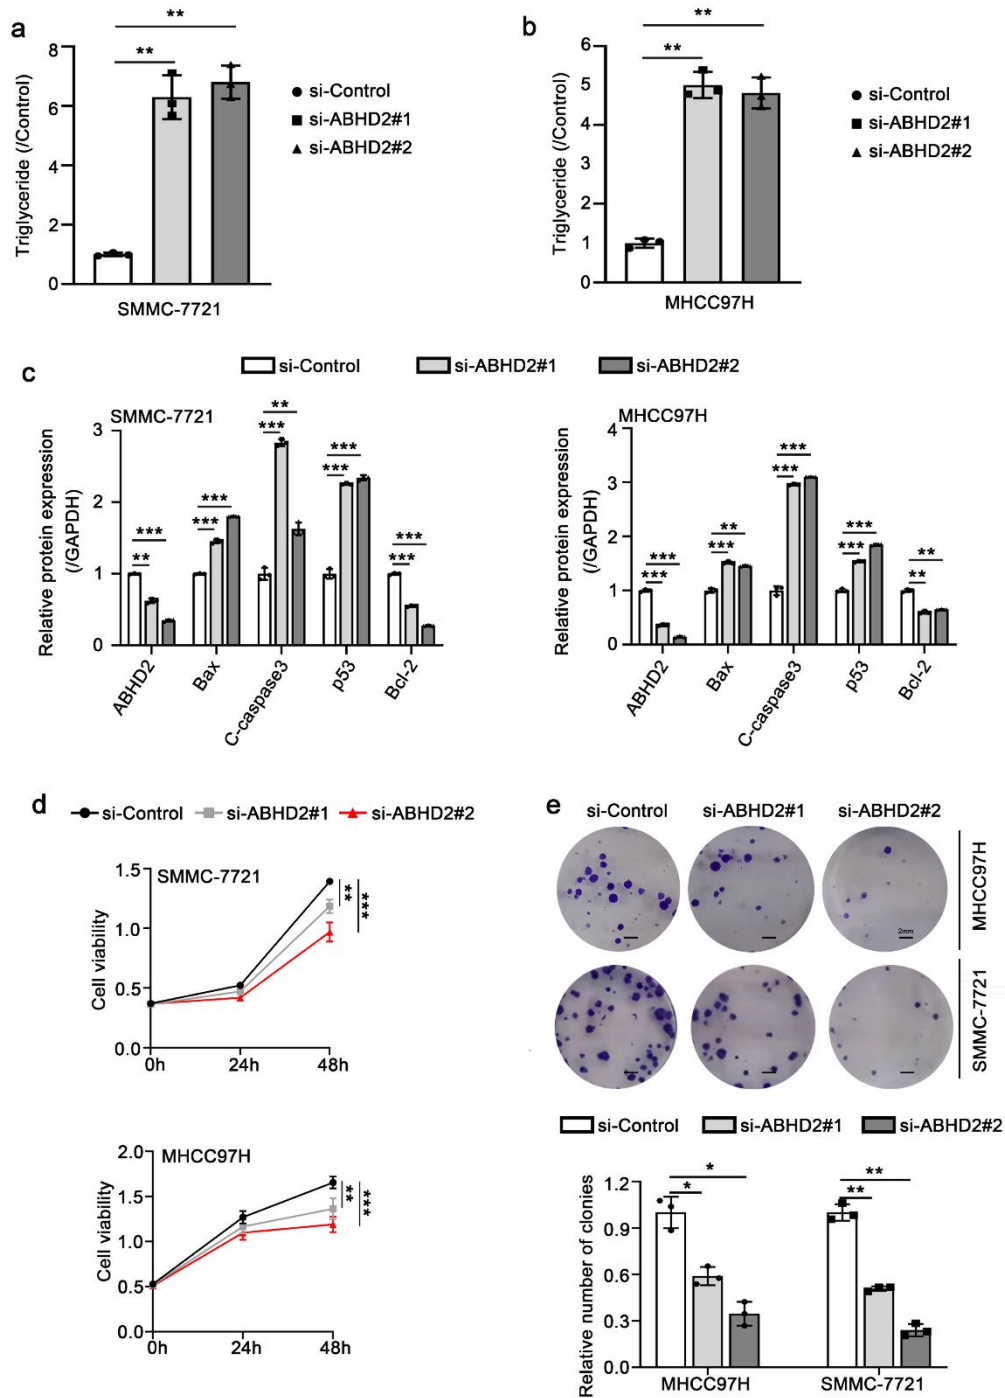

**a, b** Analysis of triglyceride (TG) levels in SMMC-7721 (a) and MHCC97H (b) cells. The cells were transfected with the indicated siRNAs. **c** Quantification of protein intensity relative to GAPDH in SMMC-7721 (left panel) and MHCC-97H (right panel) cell lines in Fig.6g. **d** CCK-8 assay for cell proliferation ability of SMMC-7721 (upper panel) and MHCC97H (lower panel)

cells at the indicated time points. The cells were transiently transfected with si-Control or si-ABHD2s. **e** Colony photographs (upper panel) and colony formation efficiency (lower panel) in MHCC97H and SMMC-7721 cells upon ABHD2 deletion. Scale bar: 2 mm. The values in the graphs represent the mean of three biologically independent experiments. Error bars represent  $\pm$ s. d. \*P < 0.05, \*\*P < 0.01, \*\*\*P < 0.001 by two-tailed Student's t-test.

**Supplementary Figure 5. NAC treatment could alleviate the inhibition of apoptosis induced by ABHD2 overexpression.**

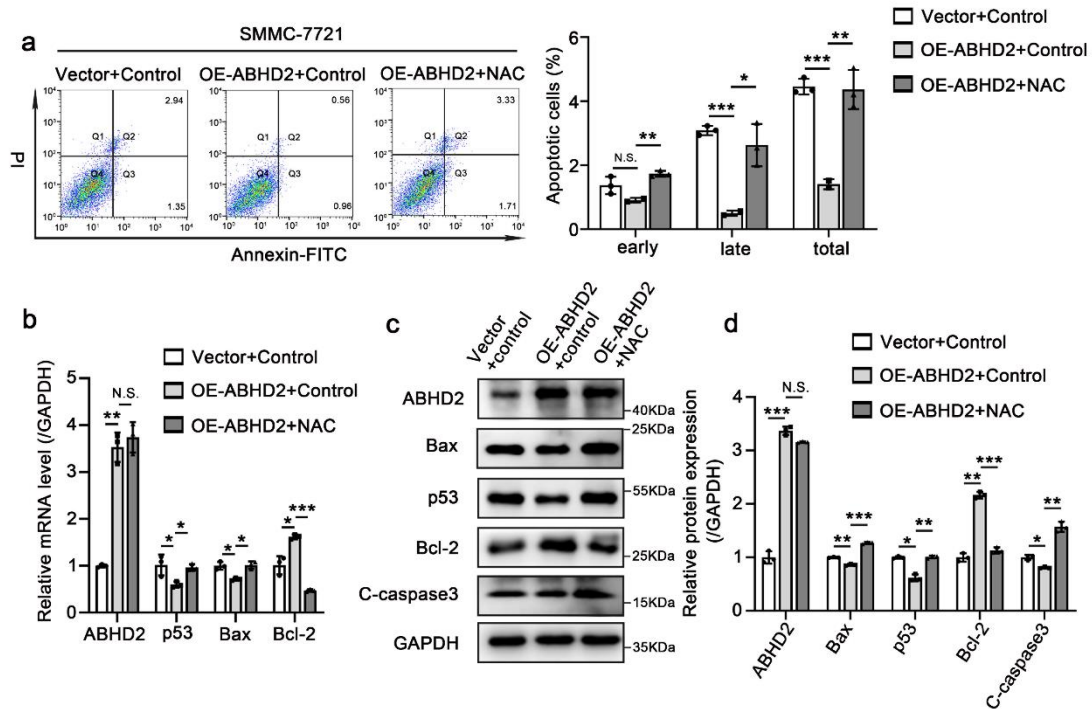

**a** Flow cytometry analysis of apoptosis in SMMC-7721 cells after transient transfection with the displayed plasmids upon DMSO or NAC treatment (5mM, 48h). The right panel is the statistical graphs. **b-d** qRT-PCR (**b**) and Western blot analysis (**c**) of the expression level of apoptosis markers in SMMC-7721 cells after transient transfection with the displayed plasmids upon DMSO or NAC treatment (5mM, 48h). The protein intensity relative to GAPDH was quantitatively analyzed in (**d**). The values in the graphs represent the mean of three biologically independent experiments. Error bars represent  $\pm$  s. d. \* $P < 0.05$ , \*\* $P < 0.01$ , \*\*\* $P < 0.001$  by two-tailed Student's t-test.

**Supplementary Figure 6. TDP-43 facilitates lipid metabolism *via* ABHD2 to suppress apoptosis *in vitro*.**

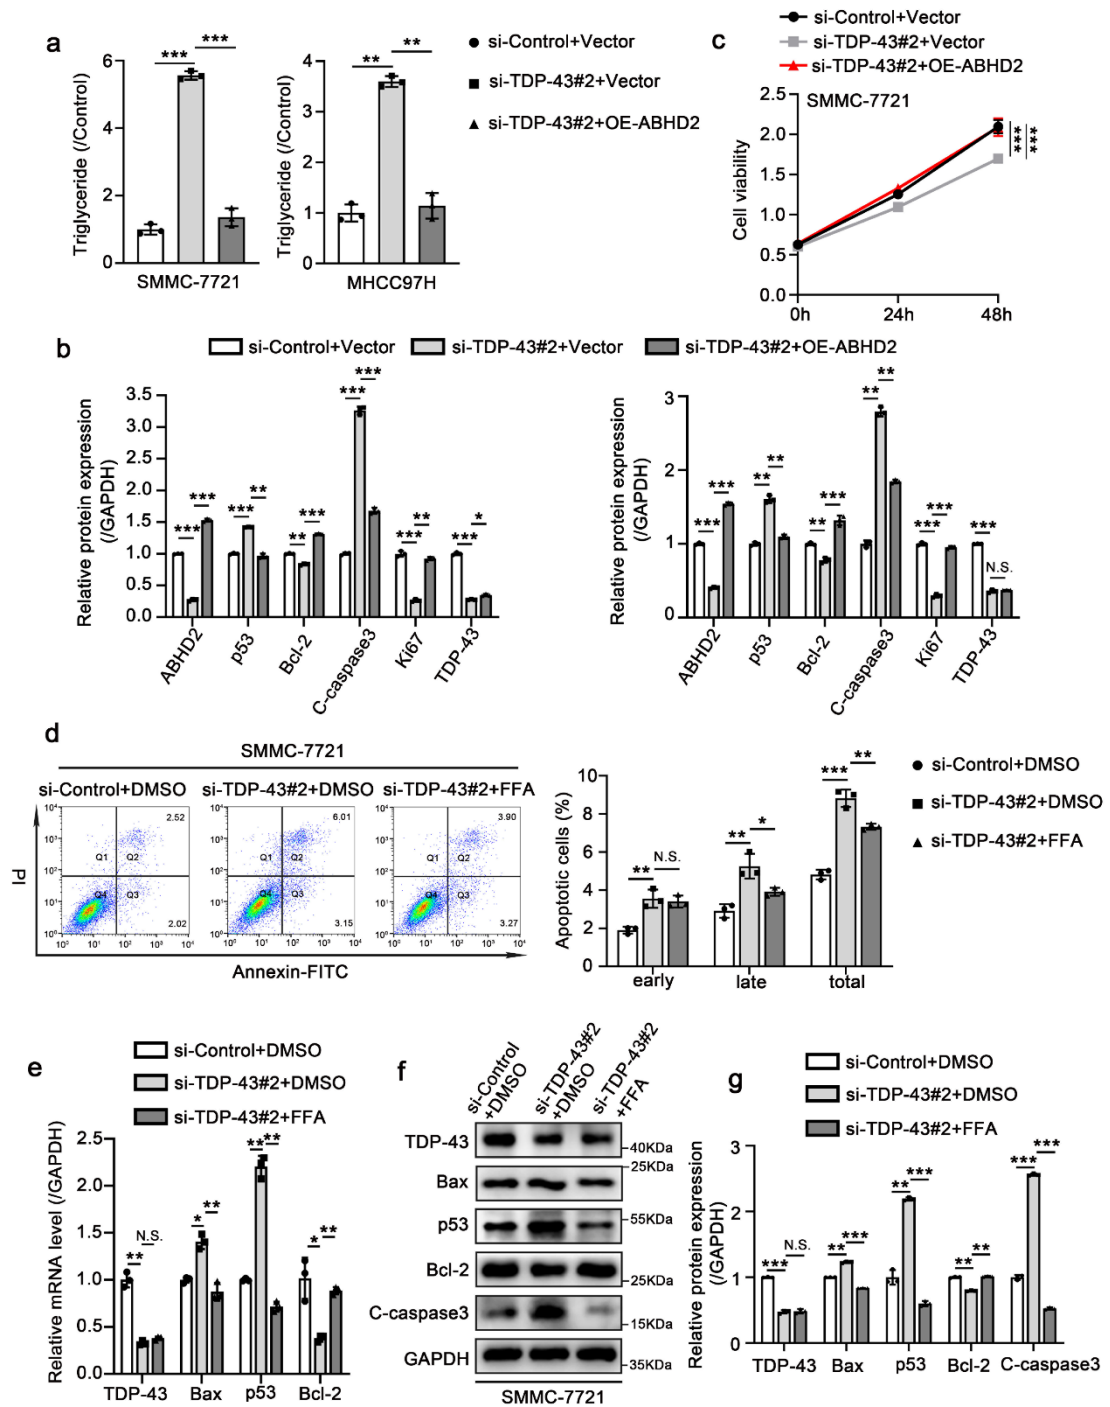

**a** Analysis of TG levels in SMMC-7721 (left panel) and MHCC97H (right panel) cells. The cells were transfected with the indicated siRNAs or plasmids. **b** Quantification of protein intensity relative to GAPDH in SMMC-7721 (left panel) and MHCC-97H (right panel) cell lines in Fig.7g. **c** CCK-8 assay for cell proliferation ability of SMMC-7721 cells at the indicated

time points. The cells were transfected with the indicated siRNAs or plasmids. **d** Flow cytometry analysis of apoptosis in SMMC-7721 cells after transient transfection with the displayed siRNAs upon DMSO or FFA treatment. The right panel is the statistical graphs. **e-g** qRT-PCR and Western blot analysis of the expression level of apoptosis markers in SMMC-7721 cells after transient transfection with the displayed siRNAs upon DMSO or FFA treatment. (g) shows the quantification of protein intensity relative to GAPDH. The values in the graphs represent the mean of three biologically independent experiments. Error bars represent  $\pm$ s. d. \*P < 0.05, \*\*P < 0.01, \*\*\*P < 0.001 by two-tailed Student's t-test.

Supplementary Figure 7. Uncropped blots of figure 1 and supplementary figure 1.

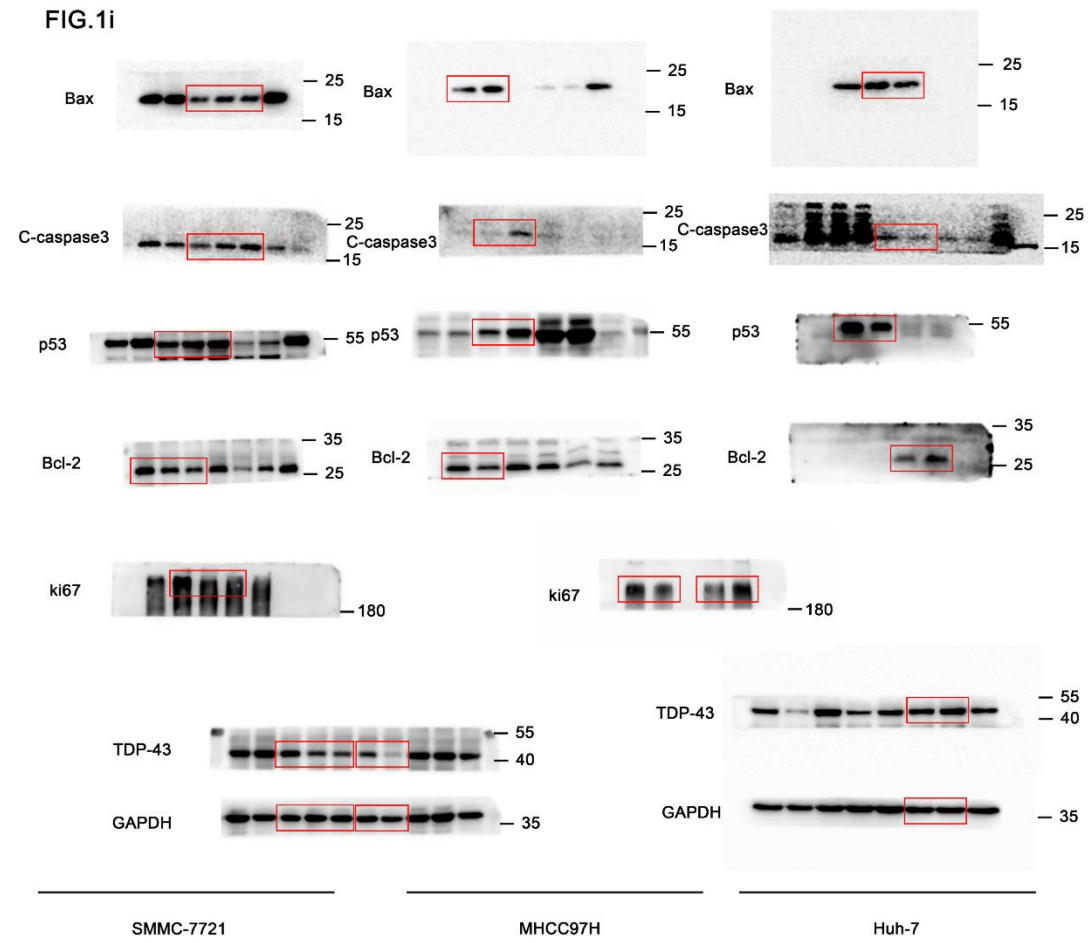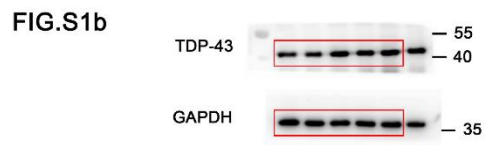



**Supplementary Figure 8. Uncropped blots of figure 4 and 6.**

**FIG.4d**

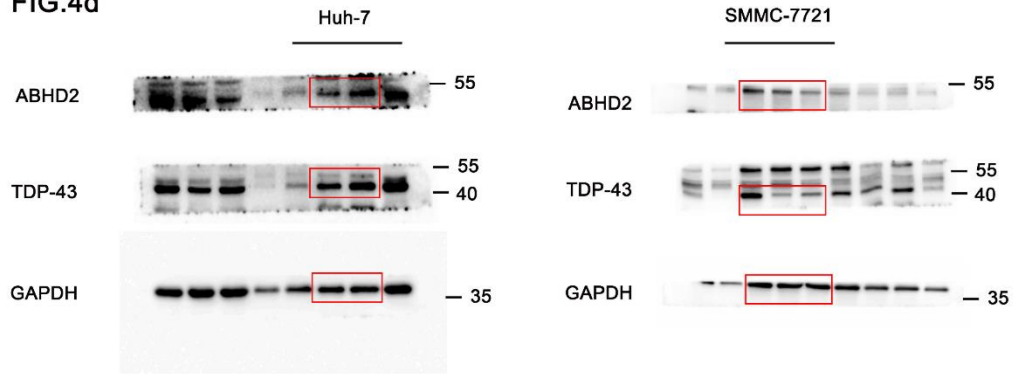

**FIG.6g**

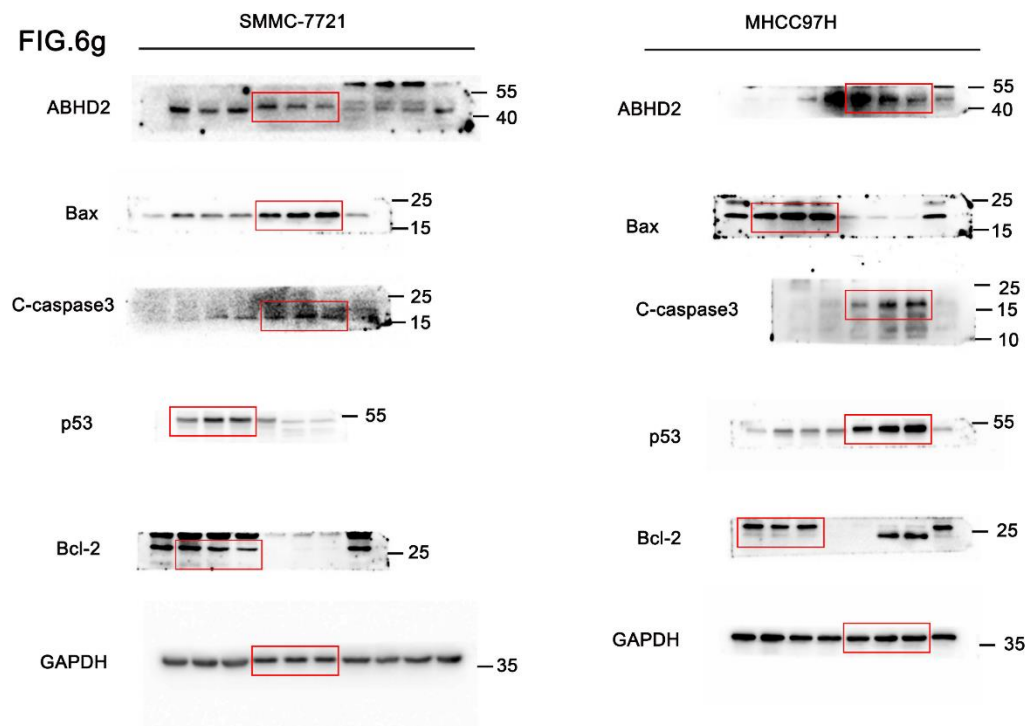

Supplementary Figure 9. Uncropped blots of Supplementary figure 5 and 6.

FIG.S5c

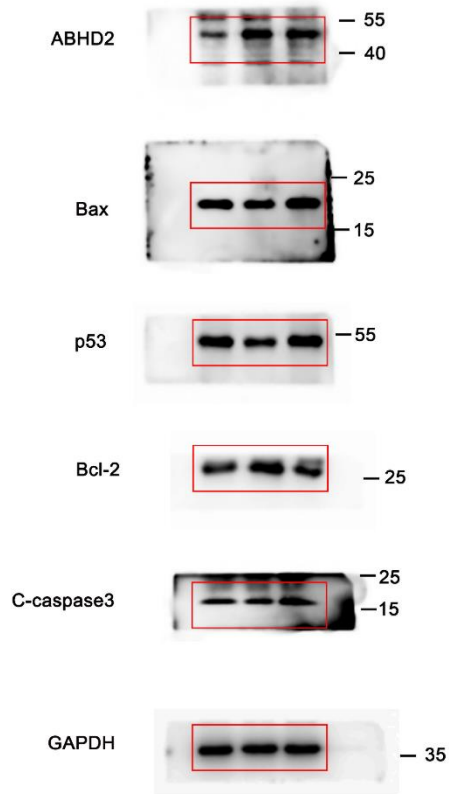

FIG.S6f

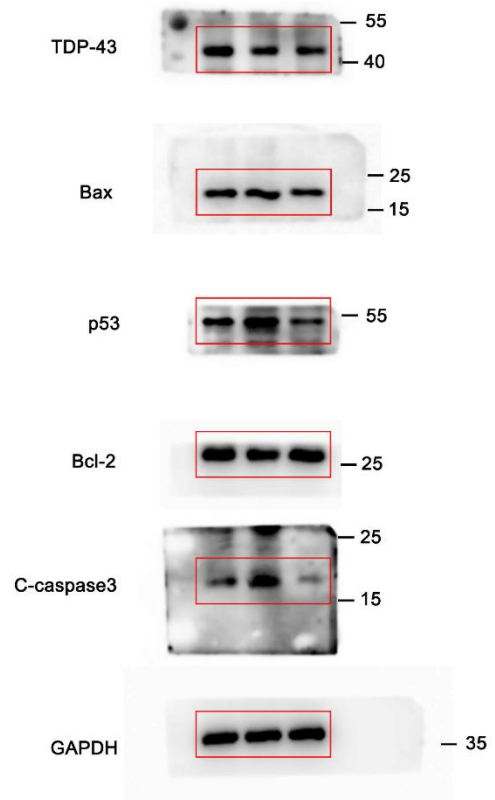

Supplementary Figure 10. Uncropped blots of figure 7.

FIG.7g

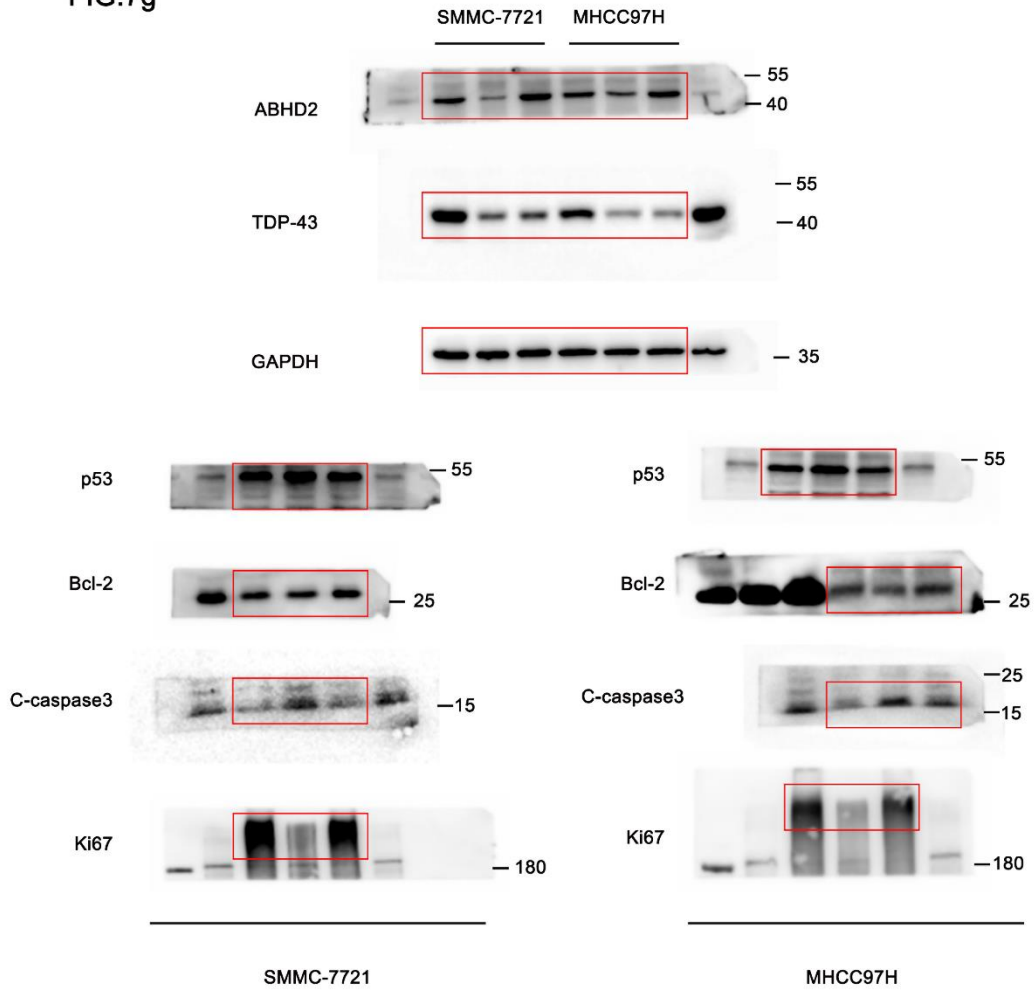

Supplement: 42003_2022_3788_MOESM2_ESM.pdf [file 42003_2022_3788_MOESM2_ESM.pdf]
