# Supplementary material for: TDP-43 upregulates lipid metabolism modulator ABHD2 to suppress apoptosis in hepatocellular carcinoma
Source: PubMed Central journal article supplement (PMC9376094; doi:10.1038/s42003-022-03788-w), 2022-08-13
Supplement: 42003_2022_3788_MOESM3_ESM.pdf [file 42003_2022_3788_MOESM3_ESM.pdf]

## Description of Additional Supplementary Files

**File name:** Supplementary Data 1

**Description:** The source data behind the graphs in the paper.
